# Supplementary material for: Do Organic Substrates Drive Microbial Community Interactions in Arctic Snow?
Source: Front Microbiol. 2019 Oct 31;10:2492. doi: 10.3389/fmicb.2019.02492 (PMC6842950; doi:10.3389/fmicb.2019.02492)
Supplement: Supplementary file 1 [file Table_1.XLSX]

## Sheet: Orig File Snow
Sample Name	Sequencing		sampling date	snow layer	Amount	Conc.	Amount	Conc.	Amount	Conc.	Amount	Conc.	Amount	Conc.	Amount	Conc.	Amount	Conc.	Amount	Conc.	Amount	Conc.	Amount	Conc.	Amount	Conc.	Amount	Conc.	Amount	Conc.	Amount	Conc.	Amount	Conc.	Amount	Conc.	Amount	Conc.	Amount	Conc.	Amount	Conc.	Amount	Conc.	Particules/ml	± S.D.	Masse Tot.	± S.D.	m/p
	16S rRNA gene	Metagenomic + Metatranscriptomic			0.01												0.1		0.05		0.5				0.1				0.25								0.05		0.5				0.1
					ppb	nmol/kg	ppb	µmol/kg	ppb	µmol/kg	ppb	µmol/kg	ppb	µmol/kg	ppb	µmol/kg	ppb	nmol/kg	ppb	nmol/kg	ppb	nmol/kg	ppb	nmol/kg	ppb	nmol/kg	ppb	nmol/kg	ppb	nmol/kg	ppb	µmol/kg	ppb	nmol/kg	ppb	µmol/kg	ppb	nmol/kg	ppb	nmol/kg	ppb	µmol/kg	ppb	nmol/kg			ppb		ppt
					Lithium		Sodium		Ammonium		Potassium		Magnesium		Calcium		Strontium		Fluor		Lactate		Acetate		Propionate		Formate		MSA		Chloride		Bromide		Nitrate		Glutarate		Succinate		Sulfate		Oxalate
CH3N-01	YES	YES	2011-04-13	SURFACE	0.0437197	6.29876	1408.69	61.2739	32.4989	1.8055	50.6945	1.2966	163.665	6.7338	75.924	1.89441	<DL		0.521129	27.4308	1.93597	21.7281	10.5356	178.437	6.01192	82.2649	27.1491	602.912	30.2431	317.98	2523.3	71.1732	0.53553	6.70217	168.597	2.71886	<DL		<DL		498.086	5.18413	4.97469	56.5113	11430	913.4	576.021	327.159	0.0503955
CH3N-02	NO	YES	2011-04-13	LAYER 2	0.160116	23.0682	10611.3	461.562	73.3536	4.0752	383.21	9.80128	1288.88	53.0292	399.521	9.96858	4.28267	48.8778	1.37894	72.5834	6.28259	70.5117	11.4864	194.539	3.83957	52.5392	23.2217	515.693	3.27958	34.4819	16395.6	462.459	60.7879	760.761	52.1974	0.841758	<DL	<DL	<DL	<DL	2888.88	30.0678	2.30368	26.1692	13209.3	319.908	153.274	74.9707	0.0116034
CH3N-03	NO	YES	2011-04-13	LAYER 3	0.180557	26.0131	12084.2	525.628	53.5053	2.97252	433.822	11.0958	1464.05	60.2364	456.396	11.3877	3.24958	37.0872	0.851326	44.8113	2.4398	27.3827	5.1277	86.8455	<DL	<DL	14.0194	311.335	<DL	<DL	18102.7	510.611	51.4164	643.477	101.11	1.63054	<DL	<DL	<DL	<DL	3227.45	33.5916	<DL	<DL	11760	263.874	107.646	19.9004	0.00915358
CH3N-05	NO	YES	2011-04-13	BASAL	0.108448	15.6242	3659.6	159.182	25.8525	1.43625	131.081	3.35262	384.315	15.8122	161.72	4.03514	1.55421	17.738	0.922814	48.5742	2.88796	32.4126	4.92285	83.376	<DL	<DL	18.1605	403.297	<DL	<DL	6480.55	182.793	14.9209	186.735	21.8503	0.352368	<DL	<DL	<DL	<DL	769.66	8.0107	1.7662	20.0637	21372.4	329.415	415.693	111.924	0.01945
CH3N-04	NO	YES	2011-04-13	LAYER 4	0.0488298	7.03498	3245.44	141.167	24.2856	1.3492	117.555	3.00668	349.804	14.3923	165.165	4.12108	1.65202	18.8543	<DL	<DL	1.36715	15.344	4.74594	80.3798	<DL	<DL	20.8172	462.296	<DL	<DL	5732.11	161.682	13.7957	172.654	18.7254	0.301974	<DL	<DL	<DL	<DL	716.176	7.45403	2.01395	22.878	20290.2	361.743	699.918	43.3729	0.0344954
CH3N-07	YES	YES	2011-04-15	SURFACE	0.203836	29.3669	12296.2	534.848	93.3082	5.18379	443.211	11.3359	1475	60.6871	468.027	11.6779	7.17668	81.9069	0.861724	45.3587	4.2729	47.9562	8.9141	150.974	2.86651	39.2242	13.4765	299.277	2.92034	30.7048	18342.9	517.387	69.4908	869.679	81.88	1.32043	<DL		<DL		3376.38	35.1417	1.77101	20.1183	17370.5	339.794	260.043	47.3425	0.0149704
CH3N-08	YES	YES	2011-04-16	SURFACE	0.13343	19.2235	8522.28	370.695	81.0179	4.50099	307.929	7.87582	1050.75	43.2318	436.803	10.8988	4.55713	52.0101	1.05668	55.6206	3.02192	33.916	9.09114	153.972	<DL		27.2333	604.782	15.3194	161.071	13759.3	388.1	38.6369	483.541	138.061	2.22643	<DL		<DL		2509.09	26.1148	4.35738	49.4988	22862.7	416.122	356.73	183.497	0.0156032
CH3N-10	NO	YES	2011-04-16	BASAL	0.0579144	8.34381	3358.29	146.076	32.8388	1.82438	138.288	3.53695	343.753	14.1433	195.188	4.8702	0.843547	9.62733	0.840927	44.264	12.6609	142.097	11.6821	197.855	<DL	<DL	21.2909	472.817	<DL	<DL	5924.64	167.112	13.3193	166.692	19.0106	0.306572	<DL	<DL	<DL	<DL	647.101	6.7351	6.29946	71.5604	20872.6	132.555	412.953	58.0815	0.0197845
CH3N-12	YES	NO	2011-04-18	SURFACE	0.22087	31.821	13441.6	584.671	116.295	6.46082	486.853	12.4521	1631.41	67.1225	592.683	14.7883	6.79961	77.6034	1.40622	74.0195	5.00161	56.1347	15.5008	262.53	<DL		21.7975	484.067	7.28423	76.5874	19527.3	550.793	61.5517	770.321	127.939	2.06319	<DL		3.09865	26.6918	3898.11	40.5719	2.60908	29.6385	25084.5	309.235	416.789	195.396	0.0166154
CH3N-13	YES	NO	2011-04-19	SURFACE	0.237335	34.1933	12894.5	560.873	88.876	4.93755	468.645	11.9864	1559.5	64.1639	505.157	12.6043	5.86702	66.9598	1.01119	53.2263	<DL		7.13935	120.916	<DL		16.3581	363.271	2.51333	26.4255	18980.9	535.382	66.0019	826.016	75.0064	1.20959	<DL		<DL		3516.93	36.6046	2.07598	23.5826	15484.7	320.98	275.209	106.286	0.0177729
CH3N-18	YES	NO	2011-04-21	SURFACE	11.299	1627.86	707403	30770	208.343	11.5746	25487.9	651.898	84792.5	3488.68	25651.6	640.042	376.516	4297.15	57.8335	3044.19	<DL		360.081	6098.52	<DL		1636.85	36350.2	<DL		1.18197e+06	33339	4035.98	50510.4	220.648	3.55827	187.739	1442.81			169560	1764.8	<DL		70275.1	2459.21	1940.58	659.755	0.027614
CH3N-21	YES	NO	2011-04-22	SURFACE	1.71302	246.797	115646	5030.26	269.016	14.9454	4354.69	111.379	12963.9	533.383	4251.6	106.083	76.4962	873.045	5.46364	287.59	<DL		33.9636	575.225	<DL		85.9716	1909.21	<DL		204862	5778.41	864.397	10817.9	146.471	2.36205	<DL		<DL		27657.6	287.863	1.36906	15.5522	52988	1003.07	1112.31	230.358	0.0209917
CH3N-22	YES	NO	2011-04-23	SURFACE	5.18731	747.343	398212	17321.1	128.223	7.1235	14019.4	358.572	47381.2	1949.44	15842.5	395.293	261.529	2984.81	60.8237	3201.58	<DL			0	<DL		NA		<DL		706762	19935.2	2993.07	37458.4	226.623	3.65462	<DL		<DL		92787.7	965.744	3.78244	42.9676	214572	518.723	5233.34	574.341	0.0243896
CH3N-23	YES	NO	2011-04-24	SURFACE	0.0408807	5.88975	3345.43	145.517	39.8401	2.21334	111.965	2.86369	327.873	13.4899	127.136	3.17222	1.24869	14.2512	1.07747	56.7151	2.03768	22.8696	1.41359	23.9414	<DL		2.21204	49.1238	<DL		5907.68	166.634	11.8487	148.287	16.9988	0.27413	<DL		<DL		652.446	6.79072	0.96872	11.0044	47339.6	736.918	775.874	51.0312	0.0163895
CH3N-25	YES	NO	2011-04-25	SURFACE	0.0704057	10.1435	3014.37	131.116	35.7578	1.98654	110.426	2.82435	322.814	13.2818	145.261	3.62446	1.14141	13.0268	1.05798	55.689	<DL		1.63228	27.6451	<DL		NA		<DL		5351.19	150.937	12.6128	157.85	16.7683	0.270413	<DL		<DL		656.177	6.82955	1.75857	19.977	118590	1877.86	1932.17	117.775	0.0162929
CH3N-28	YES	NO	2011-04-27	SURFACE	0.037474	5.39893	1785.86	77.68	31.5689	1.75383	69.5522	1.77892	169.625	6.97902	106.434	2.65567	<DL		0.908516	47.8217	2.97111	33.3458	2.46522	41.7522	<DL		5.13766	114.094	0.228077	2.39803	3184.12	89.8124	7.30227	91.3881	16.0847	0.259388	<DL		<DL		323.772	3.36985	2.71991	30.8976	79064.3	2802.8	1737.93	316.164	0.0219812
CH3N-30	YES	NO	2011-04-29	SURFACE	0.0539399	7.77119	2144.6	93.2838	45.5473	2.5304	79.7533	2.03983	231.464	9.52331	151.362	3.77669	1.20827	13.7899	1.15025	60.5457	<DL		4.14076	70.1301	<DL		12.5025	277.648	10.5601	111.031	3824.2	107.867	8.5524	107.033	27.5449	0.444201	<DL		<DL		492.758	5.12868	3.21214	36.4892	88780.3	5263.43	2233.91	417.788	0.0251622
CH3N-33	YES	NO	2011-05-02	SURFACE	0.037474	5.39893	737.374	32.0737	104.694	5.81634	31.5531	0.807025	27.5452	1.13332	82.182	2.05055	<DL		1.22172	64.3077	<DL		6.03565	102.223	<DL		19.3826	430.437	<DL		1151.95	32.4922	2.2982	28.762	157.037	2.53244	<DL		<DL		111.104	1.15638	12.9671	147.303	95057.2	3797.79	2883.09	1417.21	0.0303301
CH3N-36	YES	NO	2011-05-04	SURFACE	0.045423	6.54416	1088.09	47.329	46.6117	2.58954	42.8113	1.09497	96.1664	3.95665	105.774	2.63921	<DL		0.52893	27.8414	<DL		4.55507	77.1471	<DL		4.99278	110.877	<DL		2232.92	62.9824	4.91617	61.526	24.768	0.39942	<DL		<DL		176.339	1.83536	6.15846	69.9586	68922	2099.1	1574.83	407.871	0.0228495
CH3N-37	YES	NO	2011-05-05	SURFACE	0.0357706	5.15353	1047.49	45.5627	48.5073	2.69485	35.9037	0.918299	71.4483	2.93965	115.333	2.87771	<DL		1.2529	65.9492	4.28213	48.0598	8.14544	137.955	<DL		26.3388	584.917	19.9668	209.934	1692.1	47.7279	3.46742	43.3949	30.224	0.487406	<DL		<DL		174.987	1.82128	8.09312	91.936	98716.1	2551.59	2404.46	986.365	0.0243574
CH3N-40	YES	YES	2011-05-07	SURFACE	0.045423	6.54416	1390.49	60.4825	49.8628	2.77016	50.3396	1.28752	107.056	4.40469	155.014	3.86782	<DL		1.60889	84.6872	3.83914	43.088	7.97309	135.036	<DL		24.0749	534.641	23.3945	245.973	2302.49	64.9449	4.05192	50.7099	38.725	0.624496	<DL		<DL		262.826	2.73552	6.4445	73.208	148306	5463.73	3708.66	1143.89	0.0250069
CH3N-41	YES	YES	2011-05-08	SURFACE	0.0380418	5.48074	1818.38	79.0944	81.543	4.53017	71.3932	1.82601	222.677	9.16178	149.735	3.73609	0.725049	8.27493	0.730437	38.4481	6.92713	77.7456	27.005	457.371	13.9493	190.878	41.2857	916.848	50.3576	529.467	3282.31	92.582	4.53757	56.7878	198.329	3.19834	<DL		4.97511	42.8557	752.962	7.83691	18.9701	215.495	16073.3	487.3	468.993	88.5667	0.0291783
CH3N-43	YES	YES	2011-05-10	SURFACE	0.130023	18.7327	6548.93	284.86	80.0323	4.44624	248.973	6.36791	1240.82	51.0521	2691.09	67.1464	3.55259	40.5454	2.55162	134.31	<DL		22.0111	372.792	<DL		77.4113	1719.11	80.4452	845.812	11003.4	310.366	31.4275	393.316	156.157	2.51825	<DL		3.12627	26.9297	2206.4	22.9644	21.5002	244.238	225051	21697.9	9432.81	2644.28	0.041914
CH3N-47	YES	YES	2011-05-12	SURFACE	0.131727	18.9781	6725.07	292.521	87.5006	4.86115	262.421	6.71188	1101.7	45.3283	2242.79	55.9607	4.78683	54.6317	2.29978	121.054	<DL		35.1522	595.356	<DL		128.827	2860.92	98.4035	1034.63	11283.3	318.26	36.2759	453.994	172.201	2.77699	<DL		4.60287	39.6492	2193.41	22.8292	27.745	315.176	372111	5816.73	20898.1	3313.83	0.0561608
CH3N-48	YES	NO	2011-05-13	SURFACE	0.0493976	7.11678	1335.89	58.1076	59.5046	3.30581	49.7161	1.27158	126.724	5.2139	266.411	6.64732	<DL		0.791533	41.664	<DL		5.23013	88.5802	<DL		24.9537	554.158	14.9922	157.63	2290.85	64.6165	6.04356	75.6353	52.6424	0.848934	<DL		<DL		260.093	2.70708	4.84523	55.0407	113384	4605.66	5008.45	276.184	0.0441725
CH3N-52	YES	YES	2011-05-15	SURFACE	0.0352692	5.08128	1972.55	85.8004	45.9855	2.55475	53.7283	1.37419	588.628	24.2184	1629.45	40.6571	0.636534	7.26471	1.70487	89.7394	<DL		36.3569	615.759	<DL		91.5949	2034.09	18.2178	191.545	3367.44	94.9833	9.59614	120.096	86.9539	1.40226	0.768784	5.90827	2.87863	24.7965	499.732	5.20126	17.7407	201.53	885474	32394.6	37245.2	10464.5	0.0420624
CH3N-54	YES	YES	2011-05-16	SURFACE	0.0501303	7.22234	2951.13	128.366	58.9507	3.27504	84.3393	2.15713	607.705	25.0033	1611.42	40.207	1.18042	13.472	1.74807	92.0134	<DL		35.1223	594.85	<DL		119.31	2649.56	19.6657	206.767	5073.22	143.097	15.9963	200.194	77.5941	1.25132	<DL		4.08808	35.2147	786.338	8.18429	27.0224	306.968	1.00125e+06	145671	42725.9	13263.1	0.0426725
CH3N-56	YES	YES	2011-05-18	SURFACE	0.0910438	13.1168	5332.86	231.964	127.096	7.0609	183.123	4.68369	1156.68	47.59	2811.93	70.1614	4.25519	48.5642	4.45005	234.238	<DL		63.6039	1077.23	<DL		208.497	4630.18	69.6767	732.591	9025.75	254.584	34.7143	434.45	385.651	6.21917	1.94648	14.9591	11.8457	102.039	2323.55	24.1838	37.3002	423.721	2409240	28647.2	73883.1	24843.1	0.0306665
CH3N-57	YES	YES	2011-05-20	SURFACE	0.0338272	4.87354	834.432	36.2954	128.45	7.13609	23.8824	0.610835	149.685	6.1586	207.312	5.17271	0.327822	3.7414	1.11874	58.887	<DL		13.6929	231.909	<DL		11.8623	263.43	12.518	131.616	1512.15	42.6521	8.45813	105.854	169.431	2.73232	0.393006	3.02033	3.51714	30.2967	558.03	5.80804	5.65313	64.2182	1.25405e+06	30401.6	41242	14528.2	0.0328869
CH3N-58	YES	YES	2011-05-19	SURFACE	0.0852955	12.2886	3976.25	172.956	34.6288	1.92382	127.831	3.2695	1026.85	42.2485	2582	64.4245	2.07354	23.6651	3.13639	165.091	<DL		66.3521	1123.77	<DL		204.588	4543.37	33.6783	354.099	6790.81	191.544	24.4364	305.822	130.038	2.09705	1.11028	8.53276	5.61449	48.3632	1235.82	12.8626	39.4826	448.513	168547	4678.83	3341.32	400.644	0.0198243
CH3N-62	YES	YES	2011-05-23	SURFACE	0.0465709	6.70953	2757.4	119.939	47.6124	2.64513	86.4906	2.21215	767.794	31.59	1905.19	47.537	1.05143	11.9998	1.9851	104.49	<DL		53.9084	913.021	<DL		141.705	3146.9	22.2681	234.13	4815.82	135.837	17.5601	219.764	73.1011	1.17886	0.54675	4.20189	5.69829	49.0851	757.918	7.88849	53.4556	607.243	1.27781e+06	36793	38067.8	12631.8	0.0297915
CH3N-65	YES	YES	2011-05-25	SURFACE	0.0486623	7.01086	1138.37	49.5158	41.1161	2.28423	37.8596	0.968324	876.763	36.0734	2060.87	51.4215	0.258465	2.94984	2.73355	143.886	<DL		35.3202	598.202	<DL		102.868	2284.42	<DL		1846.11	52.072	7.57151	94.7576	40.1551	0.647558	<DL		2.67691	23.0589	173.502	1.80583	17.9879	204.338	1.24088e+06	34560.1	43259.6	15782.7	0.034862
CH3N-66	YES	YES	2011-05-26	SURFACE	0.0526115	7.57981	965.859	42.0121	33.4926	1.8607	39.8464	1.01914	955.219	39.3013	2188.33	54.6019	0.257046	2.93365	3.85335	202.829	<DL		35.7682	605.788	<DL		97.7879	2171.62	0.81119	8.52897	1556.13	43.8928	12.1631	152.222	49.6273	0.800312	<DL		1.46566	12.6252	212.604	2.21281	18.0112	204.603	1.18815e+06	48166.6	40607.7	28874.3	0.0341773
CH3N-72	YES	NO	2011-05-31	SURFACE	0.0181477	2.61457	789.463	34.3394	48.6987	2.70548	20.9348	0.535443	362.098	14.8981	906.1	22.6084	0.0893695	1.01997	1.63481	86.0518	<DL		8.43536	142.866	0.823884	11.2737	31.6487	702.836	<DL		1270.83	35.8455	2.47809	31.0133	8.8975	0.143485	<DL		<DL		26.9254	0.280242	8.73934	99.2768	458871	60097.7	42644.4	29876.2	0.0929334
CH3N-74	YES	NO	2011-06-02	SURFACE	<DL		682.164	29.6722	35.4135	1.96742	23.1031	0.590902	41.2901	1.69883	85.2188	2.12632	<DL		1.31839	69.3964	<DL		10.4133	176.365	<DL		32.1245	713.402	1.91103	20.0928	1129.76	31.8663	2.13768	26.7532	12.1891	0.196567	<DL		<DL		41.7683	0.434728	1.11769	12.6967	339016	3806.54	8244.06	597.732	0.0243176
CH3N-76	YES	NO	2011-06-04	SURFACE	0.00911932	1.31383	791.833	34.4425	41.4138	2.30077	18.5438	0.47429	25.5026	1.04928	46.7456	1.16637	<DL		0.5548	29.2031	2.58765	29.0421	4.577	77.5185	<DL		20.8604	463.255	<DL		1312.89	37.032	3.72739	46.6484	8.3311	0.134351	<DL		<DL		22.6948	0.23621	3.96196	45.0069	47818.4	1884.11	5096.07	1660.2	0.106571
[truncated: 4 more columns]
