# Supplementary material for: Do Organic Substrates Drive Microbial Community Interactions in Arctic Snow?
Source: Front Microbiol. 2019 Oct 31;10:2492. doi: 10.3389/fmicb.2019.02492 (PMC6842950; doi:10.3389/fmicb.2019.02492)
Supplement: Supplementary file 10 [file Table_10.XLSX]

## Sheet: Feuil1
Protein_Names	logFC	logCPM	PValue
Chloramphenicol acetyltransferase (EC 2.3.1.28)	-11.5085460447524	14.9150225229945	5.49517661174732e-21
Phage replication protein CRI	-9.5279632328612	12.9896519968283	2.42431835151416e-16
Adenine specific DNA methyltransferase	-9.23437360693172	12.7091865635948	1.2166380642043e-15
Replication initiation protein (Protein E) (Protein rep)	-9.19304120964905	12.6448343736518	1.62208389868541e-15
Resolvase (Resolvase (Protein d))	-7.7039720947471	11.2745010138642	6.83912862454632e-12
Rep protein (Fragment)	-7.60020121391162	11.1816268241149	1.28846506479231e-11
Arsenical-resistance protein	-7.39819385513311	11.6896114848206	5.22673034803052e-12
T-DNA border endonuclease, VirD2 protein	-7.35913419199469	11.0372301910609	3.68847488062671e-11
Peptidase U62, modulator of DNA gyrase	-6.96819972860648	12.4760944818022	9.56725397225706e-13
DNA-invertase	-6.9219157120495	10.6811041611403	6.84175928461198e-10
Type II DNA restriction endonuclease R.NGOI	-6.78973649012458	10.5844354021175	1.59101363273223e-09
Chromate transport protein ChrA	-6.26910512783486	10.2140464878055	5.54461709463343e-08
Putative cation efflux protein	-6.23427092956418	10.1881865122743	7.4366467348874e-08
Permease YjgP/YjgQ family protein	-6.23114670901721	11.0212783515374	4.15692032638745e-10
Multidrug resistance efflux pump, putative	-5.9904484797953	10.0268565134329	3.75010162382206e-07
Peptide chain release factor 1 (RF-1)	-5.66443102508947	12.3331846418239	7.45960765890377e-10
ISSpo9, transposase	-5.57747413298708	9.78800136604058	4.33759870390042e-06
IS66 family element, transposase (Fragment)	-5.3694645517529	9.67738381466469	1.69299381817169e-05
Putative plasmid maintenance system antidote protein, XRE family	-5.2399655182458	9.60677999754855	3.44120458598627e-05
Hydrolase, alpha/beta domain protein	-5.19535549346472	9.94693312386497	8.9286720585386e-07
ABC1 family protein	-5.11553104941146	9.55151603979542	5.63252786868127e-05
Aquaporin Z	-5.09117251041633	12.1969298162988	8.99401210873597e-09
Toxin-antitoxin system, antitoxin component, ribbon-helix-helix domain protein	-4.94856867955318	10.3129962101252	9.09987188730462e-07
Regulatory protein ArsR	-4.94356673172038	9.47389240748356	0.000119297088898081
AMP-binding enzyme	-4.82462789426548	9.73992426489563	9.81565510144402e-06
MobA protein	-4.80792696641176	9.40874240784695	0.000256913263555928
MobA/MobL protein	-4.64466623604351	11.1096820375388	2.16435272733182e-07
Transcriptional regulator, CopG family	-4.56501550222043	9.31533832938783	0.000555069066381909
33 kDa chaperonin	-4.54366819739893	9.31011247906986	0.000555322793937121
Amine oxidase (Flavin-containing)	-4.48295205585659	9.28635968569828	0.000716286989838686
Exodeoxyribonuclease 7 large subunit (EC 3.1.11.6)	-4.4126018294067	9.83482784629162	9.24962129993451e-05
XRE family plasmid maintenance system antidote protein	-4.39698370383422	9.25483841487583	0.00123112414851521
Multifunctional fusion protein [Includes: Urease subunit alpha (EC 3.5.1.5) (Urea amidohydrolase subunit alpha); Urease subunit beta (Urea amidohydrolase subunit beta)]	-4.32991495273353	9.23221628702095	0.00123673573674816
Acyltransferase, WS/DGAT/MGAT (EC 2.3.1.-)	-4.18087313642056	9.18386027344037	0.00230911235170406
Mobilization relaxase	-4.16732583129951	9.18036312476728	0.00231528096041126
Resolvase-like serine recombinase	-4.15057784302689	9.17578060555092	0.00232353300421477
IS66 family element, Orf2 protein	-4.13048874233494	9.41349607967152	0.000254587157392156
Acetolactate synthase (EC 2.2.1.6)	-4.12379421178011	11.9226693715496	1.1567796055123e-06
Propionate--CoA ligase (EC 6.2.1.17)	-4.11443532724118	9.16316230606637	0.00235151261920509
Transferase hexapeptide protein	-4.06898933121391	9.14864441639427	0.00328395217001914
Probable multidrug resistance protein. AcrB/AcrD/AcrF family protein	-4.01912276416962	9.43472052846067	0.00126461568166736
NADPH-dependent FMN reductase	-3.91835819981061	11.2329128079758	3.7735266949234e-06
Efflux pump membrane protein	-3.90591386305985	9.1040190461319	0.00486432358323681
Toxin-antitoxin system, toxin component, RelE family	-3.89378631528346	9.10196676656439	0.00688476018931084
Transmission sensor LetS	-3.89346880378124	9.09914304663998	0.0049017653631651
Orotidine 5'-phosphate decarboxylase (EC 4.1.1.23) (OMP decarboxylase) (OMPDCase) (OMPdecase)	-3.85647541460256	10.4288920291888	2.63693147127486e-05
Heavy metal transport/detoxification protein	-3.84744867272939	9.66184267787818	0.000609354676563815
Resolvase	-3.79211137762214	9.875483746961	0.000200798243442464
FtsK/SpoIIIE family protein	-3.77312608946922	9.28218373253057	0.000932504043030038
RagB/SusD domain protein	-3.69961894854615	9.28578576859662	0.00566393163792104
Cupin 4 family protein	-3.69452474565124	9.04773163053022	0.0102706986364044
Peptidase family M3 (EC 3.4.-.-)	-3.69272420156211	9.25509171306421	0.00123109682217035
Putative organic hydroperoxide resistance protein	-3.6660757204787	9.65069982947155	0.00062321266538993
Phospholipase D domain protein (EC 3.1.-.-)	-3.57877130384085	9.02416575406567	0.0153278004513978
Cadmium-exporting ATPase (EC 3.6.3.3)	-3.57876950392941	9.21364584150982	0.00226070694220132
Glycoside hydrolase family 76	-3.56356782020203	9.27007572555548	0.00740267427491615
Putative D-alanyl-D-alanine carboxypeptidase/D-alanyl-D-alanine-endopeptidase	-3.52096328107915	9.01031881654293	0.0153464711823332
Sulfate ABC transporter, sulfate-binding protein	-3.52096328107915	9.01031881654293	0.0153464711823332
UPF0313 protein ENHAE0001_2278	-3.52096328107915	9.01031881654293	0.0153464711823332
CobQ/CobB/MinD/ParA nucleotide binding domain protein	-3.47212568623328	9.18659958950253	0.00316232785948465
Putative NADPH-flavin oxidoreductase	-3.45818060297583	8.99875042552307	0.0232689114789192
McnC protein	-3.43574893796126	9.23095819201779	0.00982977422071036
RagB/SusD domain-containing protein	-3.42687346013145	9.64920388427803	0.0045223475121928
Transcriptional regulator, ArsR family	-3.41401207230927	10.403318308272	0.000114002018368633
Lactose operon repressor	-3.41200918498684	8.99229670377628	0.0232820063626296
Xylose isomerase domain-containing protein TIM barrel	-3.38951843557833	8.9833831068884	0.0231899046779301
RepA	-3.38128700234962	9.21374230009302	0.00991974190368839
CTP synthase (EC 6.3.4.2) (Cytidine 5'-triphosphate synthase) (Cytidine triphosphate synthetase) (CTP synthetase) (CTPS) (UTP--ammonia ligase)	-3.38046299144038	9.39026091221755	0.0020980691277519
DEAD/DEAH box helicase	-3.3764637836724	9.94903818679578	0.000303040268268341
Acetate kinase (EC 2.7.2.1) (Acetokinase)	-3.34654131885001	9.34386014490657	0.00341845953495262
MltA-interacting protein MipA	-3.32371477250812	8.97279948299244	0.0230615337694247
ATPase, AFG1 family	-3.30869954762199	8.96525095775148	0.0229620663547285
Plasmid maintenance system killer	-3.29976692810098	9.10689097860813	0.00683789059648864
Pseudaminic acid biosynthesis-associated protein PseG	-3.29032671277839	8.9656692339619	0.0361008303251223
Peptidase, M48 family (EC 3.4.24.-)	-3.27082749199287	9.15511101350648	0.0186245217859195
Type IV pilus secretin PilQ	-3.25664625342227	8.95851965034301	0.0359733428668205
Putative glutamyl-queuosine tRNA(Asp) synthetase	-3.25664625342227	8.95851965034301	0.0359733428668205
NgoMIV restriction enzyme	-3.25664625342227	8.95851965034301	0.0359733428668205
DNA topoisomerase 1 (EC 5.99.1.2) (Fragment)	-3.25664625342227	8.95851965034301	0.0359733428668205
Lipoprotein releasing system, transmembrane protein, LolC/E family	-3.2236334035873	8.95135076057849	0.0355341984790469
Lipoprotein signal peptidase (EC 3.4.23.36) (Prolipoprotein signal peptidase) (Signal peptidase II) (SPase II)	-3.21791965901382	10.0176398644856	0.000386031848702486
Succinyldiaminopimelate transaminase (EC 2.6.1.17)	-3.19100482967506	8.94416259556938	0.0349671048733967
Rhodanese domain protein	-3.18573004272411	9.38029149755521	0.00758241843241839
UDP-N-acetylmuramoyl-tripeptide--D-alanyl-D-alanine ligase (EC 6.3.2.10) (D-alanyl-D-alanine-adding enzyme)	-3.18447988874087	9.92476230088141	0.000852941913943726
Superoxide dismutase SodM-like protein	-3.17914977980613	8.9423897266135	0.0348214019556846
Peptidase M16 domain protein	-3.15542808931946	9.09625777585604	0.0069394190572209
Thiamine-phosphate synthase (TP synthase) (TPS) (EC 2.5.1.3) (Thiamine-phosphate pyrophosphorylase) (TMP pyrophosphorylase) (TMP-PPase)	-3.12750479995922	9.52945990987735	0.00223697424052633
Coenzyme A biosynthesis bifunctional protein CoaBC (EC 4.1.1.36) (EC 6.3.2.5) (DNA/pantothenate metabolism flavoprotein)	-3.12697914006471	9.42210722799207	0.00579635904349656
Iron chelate uptake ABC transporter, FeCT family, permease protein	-3.11736261952003	10.5168920961346	0.000272868755773495
NADH dehydrogenase subunit L	-3.00792926681432	9.11720811709893	0.0368622181102871
Phosphate regulon transcriptional regulatory protein PhoB	-3.00239322860067	9.03702321120999	0.0152290241383512
CAAX amino terminal protease family protein	-3.00123803568141	9.05364940949043	0.0150899965824778
Adenine specific DNA methylase Mod	-2.96367753551553	8.91502960350285	0.0465635557162971
RNA-metabolising metallo-beta-lactamase	-2.9523578873864	9.23984736780623	0.0252940272560072
Putative general secretion pathway protein	-2.93983341113227	8.90991351405757	0.0465635557162971
Arsenate reductase	-2.93544905222565	11.2069676654526	0.000262372073152107
Cation-transporting ATPase	-2.9341459885288	9.21539567859863	0.0440305074395983
WD40-like protein	-2.93177057270526	8.90895436112675	0.0465635557162971
Peptide synthetase	-2.92599101580547	8.90764841527418	0.0465635557162971
CobW/P47K family protein	-2.86549398339325	9.02851932065458	0.0153069682167912
Cell division protein FtsW	-2.86056629818026	8.93106619969571	0.0465635557162971
Hydrolase, NUDIX family	-2.85355998539963	9.36123024737606	0.00951939901015472
Lac repressor (LacI transcriptional repressor) (Lactose operon repressor) (Transcriptional repressor of the lac operon)	-2.8519058754469	9.18416099256117	0.0445566348077634
Diguanylate phosphodiesterase	-2.84965291904574	9.36154094061992	0.00951924632094753
Protein PatA	-2.64909849807558	9.10777074241528	0.0371796036361803
ATP-dependent helicase HepA	-2.63569590903179	9.10963200317695	0.0371155520570805
TldD/PmbA family protein	-2.62134833955087	8.95399926200816	0.035734106712589
ATPase/histidine kinase/DNA gyrase B/HSP90 domain protein	-2.5734781227784	10.2901610149237	0.00415235998066065
Transposase, IS605 OrfB family	-2.56598338375354	9.47973652753607	0.0185496669172689
Sec-independent protein translocase protein TatB	-2.52375068349888	9.25853404564179	0.0252694385261945
Addiction module killer protein	-2.50610147231715	9.10813413551189	0.0371670405194244
Ribonuclease PH (RNase PH) (EC 2.7.7.56) (tRNA nucleotidyltransferase)	-2.45879238586914	9.09112595267436	0.0376574402448695
Antitoxin	-2.45721031570697	10.4683904652483	0.00319747896961088
Methionyl-tRNA formyltransferase (EC 2.1.2.9)	-2.45460873526787	9.31198231912725	0.0394049156524313
Enolase (EC 4.2.1.11) (2-phospho-D-glycerate hydro-lyase) (2-phosphoglycerate dehydratase)	-2.4391679563769	9.91393480723308	0.0108074756682058
ATP-dependent helicase HrpA	-2.40452685848973	9.20104028515221	0.044263043998128
Ferrochelatase (EC 4.99.1.1) (Heme synthase) (Protoheme ferro-lyase)	-2.35304904198764	10.0679797576537	0.0104147864831088
TonB-dependent receptor plug	-2.32632239084095	11.665935619513	0.00469879554225361
Malonyl CoA-acyl carrier protein transacylase (EC 2.3.1.39)	-2.3252960591025	9.61956586536718	0.0261128943860429
Type II restriction enzyme, methylase subunit	-2.29379055105491	9.87504321161885	0.016820705484826
Hypothetical conserved protein	-2.22471544065884	9.57155859693761	0.0377728814245658
DNA polymerase I (EC 2.7.7.7)	-2.21420730858039	10.3426195630226	0.00855199626183119
Plasmid recombination protein	-2.04127293121845	10.5649934405476	0.0269284934606973
Addiction module toxin, RelE/StbE family	-1.85617564489818	10.1060049983732	0.0424387613600881
Amino acid carrier protein	-1.75277515833188	10.7498806674419	0.0375177681241884
